# Supplementary material for: Contrasting In Vitro Apatite Growth from Bioactive Glass Surfaces with that of Spontaneous Precipitation
Source: MDPI journal article supplement (doi:10.3390/ma11091690), 2018-09-12
Supplement: s1 [file s1]

# Supporting Information for

## Contrasting *In Vitro* Apatite Growth From Bioactive Glass Surfaces with that of Spontaneous Precipitation

Yang Yu, Zoltán Bacsik, and Mattias Edén\*

Department of Materials and Environmental Chemistry, Stockholm University, SE-106 91  
Stockholm, Sweden

\*Corresponding author. E-mail: [mattias.eden@mmk.su.se](mailto:mattias.eden@mmk.su.se)

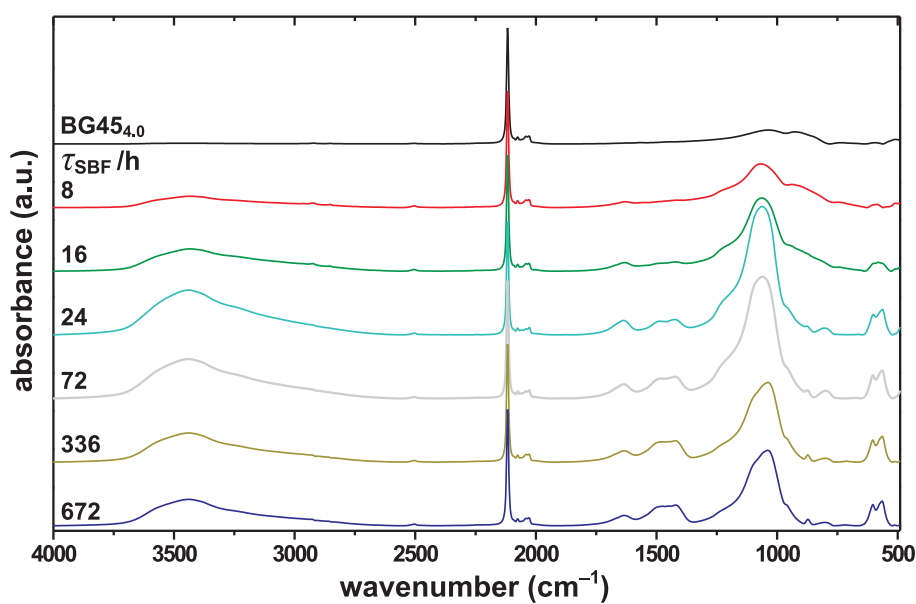

**Fig. S1.** FTIR spectra shown across the full spectral range recorded.
